# Supplementary material
Source: PubMed Central journal article supplement (PMC6548661)
Supplement: NIHMS1525623-supplement-1.pdf [file NIHMS1525623-supplement-1.pdf]

## Supplementary Fig S1.

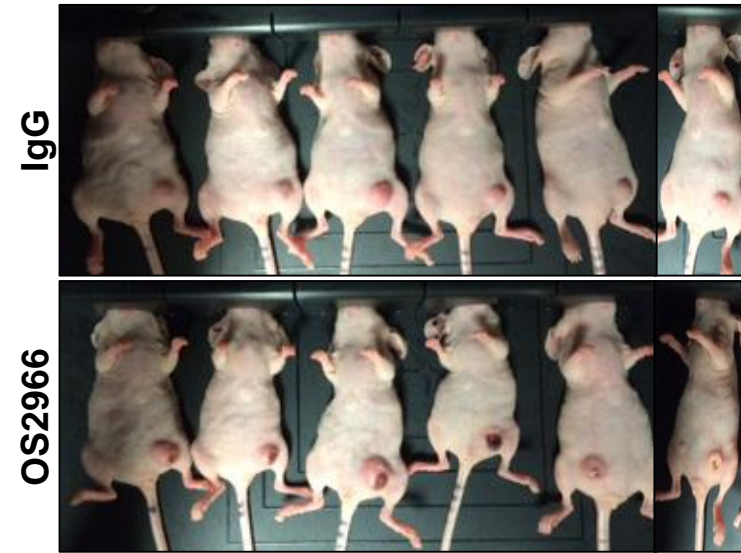

**Supplementary Figure S1. Enhanced virus replication by combination treatment with oHSV and OS2966 significantly increases tumor necrosis.** Representative images of mammary fat-pad injected MDA468 tumor bearing mice treated with control IgG or OS2966 with oHSV.
