# Supplementary material
Source: PubMed Central journal article supplement (PMC6548661)
Supplement: NIHMS1525623-supplement-3.pdf [file NIHMS1525623-supplement-3.pdf]

## Supplementary Fig S3.

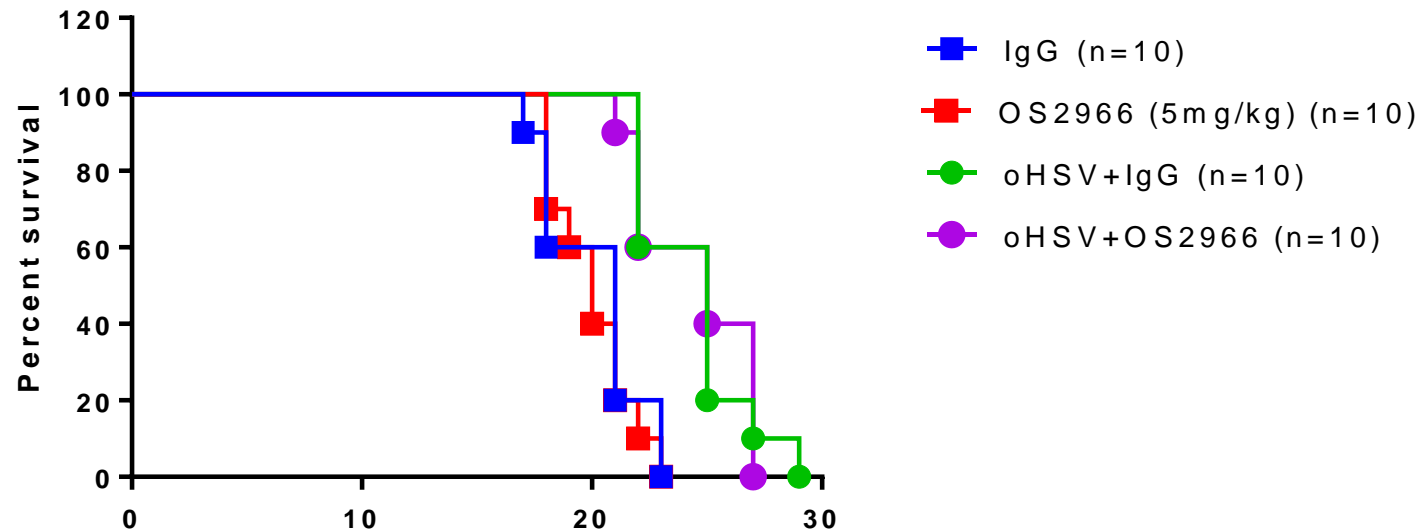

**Supplementary Figure S3. Combination treatment with OS2966 and oHSV does not enhance mice survival rate in intracranial glioma-bearing mice in vivo.** Athymic nude mice bearing intracranial patient derived primary GBM30 tumors were treated with control IgG or OS2966 (5mg/kg) intraperitoneally twice a week for the duration of study and were treated with intratumoral injection of PBS or  $1 \times 10^5$  pfu of oHSV on day 10. Data shown are Kaplan Meier survival curves of animals in each group (N=10 for IgG, OS2966, oHSV+IgG, and oHSV+OS2966).
