# Supplementary material
Source: PubMed Central journal article supplement (PMC6548661)
Supplement: NIHMS1525623-supplement-4.pdf [file NIHMS1525623-supplement-4.pdf]

## Supplementary Fig S4.

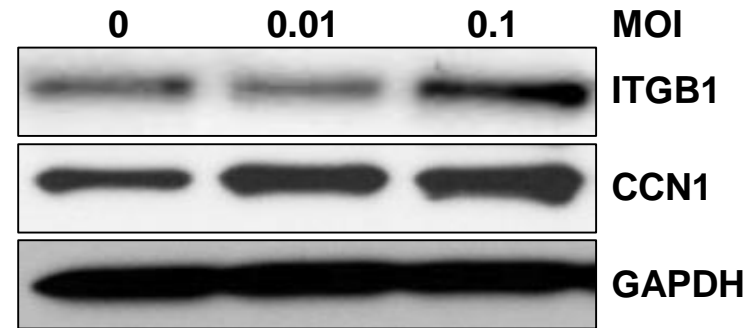

**Supplementary Figure S4. oHSV infection increases ITGB1 expression.** LN229 glioma cells were infected with an increasing multiplicity of infection (MOI) of 34.5ENVE and cells were harvested at 12 hours post infection. Cell lysates were probed with antibodies against ITGB1.  $\beta$ -tubulin was used as a loading control. 34.5ENVE infection increased both ITGB1 and CCN1 protein levels in dose dependent manner.
