# Supplementary material
Source: PubMed Central journal article supplement (PMC6548661)
Supplement: NIHMS1525623-supplement-5.pdf [file NIHMS1525623-supplement-5.pdf]

## Supplementary Table S1.

| Primer       | Sense                             | Antisense                           |
|--------------|-----------------------------------|-------------------------------------|
| STAT1        | 5' – GGAACCTTGATGGCCCTAAAGGA – 3' | 5' – ACAGAGCCCACTATCCGAGACA – 3'    |
| CCN1         | 5' – AATGGACCTCGCATCCTATA – 3'    | 5' – TTCTTTCACAAGGCGGCA – 3'        |
| IFN $\alpha$ | 5' – AGCCATCTCTGTCCTCCATGAG – 3'  | 5' – TGCATCACACAGGCTTCCAA – 3'      |
| IFN $\beta$  | 5' – TCAATGAGGAGACTTGCCTGGT – 3'  | 5' – TCTGCAGGAAGTGGATCAGGAC – 3'    |
| OAS1         | 5' – TGGCCTTCTATGCCCTCTATCC – 3'  | 5' – TCCCATCAGGTGCACAGAAGA – 3'     |
| OAS2         | 5' – TTCGAGATCCAGAAGTCCCTTG – 3'  | 5' – CCCTTCTTTGGCTTTTCTCTCC – 3'    |
| IRF3         | 5' – AGGACCCTCACGACCCACATAA – 3'  | 5' – GGCCAACACCATGTTACCCAGT – 3'    |
| IRF9         | 5' – TTCTGTCCCTGGTGTAGAGCCT – 3'  | 5' – TTTCAGGACACGATTATCACGG – 3'    |
| PKR          | 5' – GGAACCTTGGCATAATGAGCC – 3'   | 5' – CGTCCCGTAGGTCAGTGAAAAA – 3'    |
| MCP-1        | 5' – ATCTCCTTGGCCACAATGGTC – 3'   | 5' – AGATGCAATCAATGCCCCAG – 3'      |
| GAPDH        | 5' – GGAGTCAACGGATTTGGTTCG – 3'   | 5' – GGAATCATATTGGAACATGTAAACC – 3' |

**Supplementary Table S1. Used primer sequences.** Primers were designed using the Primer Express Program (Applied Biosystems, Carlsbad, CA). Abbreviations: STAT, signal transducer and activator; IFN $\alpha$ , Interferon alpha; IFN $\beta$ , Interferon beta; IRF, interferon regulatory factor; OAS, 2'5'-oligoadenylate synthetase; PKR, double stranded RNA-dependent protein kinase; MCP-1, Monocyte Chemoattractant Protein-1; CCN1, Cysteine-rich 61; GAPDH, glyceraldehyde-3-phosphate dehydrogenase.
